# Supplementary material for: Depth-dependent variability of biological nitrogen fixation and diazotrophic communities in mangrove sediments
Source: PubMed Central journal article supplement (PMC8549172; doi:10.1186/s40168-021-01164-0), 2021-10-27
Supplement: 40168_2021_1164_MOESM2_ESM.pdf [file 40168_2021_1164_MOESM2_ESM.pdf]

**Additional file 1:** The detailed method for measuring nitrogen fixation rate by acetylene reduction assay.

### Acetylene reduction assay

Acetylene reduction assay is used to determine sediment nitrogenase activity (Han et al, 2019). Fresh sediment (10g) was weighed and put into 100 mL serum vial. The vials were sealed with rubber stoppers and 10% of the headspace was replaced with pure and fresh acetylene (C<sub>2</sub>H<sub>2</sub>) before they were incubated in dark at 25 °C. After incubation for 48 h, 200 µL headspace gas was taken out to measure the concentration of ethylene (C<sub>2</sub>H<sub>4</sub>) by Agilent gas chromatograph (HP7890B, Agilent, USA) equipped with a flame ionization detector and a HP-PLOT MoleSieve5A capillary column (30.0 m × 530 µm × 50 µm) (Agilent, USA). The chromatograms were used to integrate the areas of C<sub>2</sub>H<sub>4</sub> to estimate C<sub>2</sub>H<sub>4</sub> productions (Das and De, 2018). As the C<sub>2</sub>H<sub>4</sub> productions from the chromatograms only represent the molar mass of C<sub>2</sub>H<sub>4</sub> ( $M_{C_2H_4}$ , nmol) of the 200 µL headspace gas, the total C<sub>2</sub>H<sub>4</sub> concentrations should multiply 500 (that is the total volume (100 mL) divide the measured volume (200 µL)). In short, the total C<sub>2</sub>H<sub>4</sub> productions =  $M_{C_2H_4} \times 500$  (nmol).

### Nitrogen fixation rate

Nitrogen fixation rate (NFR) was represented as acetylene reduction (nmol C<sub>2</sub>H<sub>4</sub> g<sup>-1</sup>h<sup>-1</sup>) in this research:

$$NFR = \frac{\text{Total } C_2H_4 \text{ production}}{\text{Incubation time} \times \text{mass of sediment}} = \frac{M_{C_2H_4} \times 500 \text{ (nmol)}}{48 \text{ (h)} \times 10 \text{ (g)}}$$
$$= \frac{25}{24} M_{C_2H_4} \text{ (nmol } C_2H_4 \text{ g}^{-1}h^{-1})$$

### References:

Han L, Wang Q, Shen J, Di HJ, Wang J, Wei W, et al. Multiple factors drive the abundance and diversity of the diazotrophic community in typical farmland soils of China. *FEMS Microbiol Ecol.* 2019;95(8).

Das S, De TK. Microbial assay of N<sub>2</sub> fixation rate, a simple alternate for acetylene reduction assay. *MethodsX.* 2018;5:909-914.
