# Supplementary material for: Depth-dependent variability of biological nitrogen fixation and diazotrophic communities in mangrove sediments
Source: PubMed Central journal article supplement (PMC8549172; doi:10.1186/s40168-021-01164-0), 2021-10-27
Supplement: 40168_2021_1164_MOESM3_ESM.pdf [file 40168_2021_1164_MOESM3_ESM.pdf]

1 **A. Supplementary tables**

2 **Table S1.** A summary of reads information and microbial classification at different taxonomic  
3 levels.

4 **Table S2.** Pearson's correlations between the abundance of diazotrophic genera and the  
5 nitrogen fixation rate (NFR).

6 **Table S3.** Relative abundances of diazotrophic communities at the genus level.

7 **Table S4.** Mantel test for the correlations between diazotrophic community structure and  
8 sediment properties.

9

10 **B. Supplementary figures**

11 **Fig. S1.** The location of the sampling habitats at the Qi'ao Island, Guangdong Province, China.

12 **Fig. S2.** Relationships between the depth of mangrove sediments and the NFR (**a**), water  
13 content (**b**), salinity (**c**), Shannon index (**d**) and Chao1 index (**e**). NFR was represented as  
14 acetylene reduction ( $\text{nmol g}^{-1} \text{h}^{-1}$ ) in this research. Black lines and grey shaded areas  
15 represent linear regressions and 95% confidence intervals, respectively.  $R^2$  was obtained by  
16 linear regression analysis and  $p$  was obtained by Pearson's correlation analysis.

17

18 **Fig. S3.** The in-depth profile of physicochemical properties. The concentration of  $\text{NH}_4^+$  (**a**),  
19  $\text{NO}_2^-$  (**b**),  $\text{NO}_3^-$  (**c**), pH (**d**), water content (**e**), salinity (**f**), total Fe (**g**), available Fe (**h**) and  $\text{Fe}^{3+}$   
20 (**i**) across 10 depths of mangrove sediments. Boxplots depict the 25-75% quantile range of  
21 the selected measurements, with the centerline depicting the median (50% quantile).  
22 Whiskers show the minimum and maximum values.

23 **Fig. S4.** Bray-Curtis distance-based hierarchical clustering of diazotrophic communities  
24 across 10 depths of mangrove sediments. The color gradient represents sediment depth.

## A. Supplementary tables

**Table S1.** A summary of reads information and microbial classification at different taxonomical levels.

| Samples     | Reads  | OTUs | Phylum | Class | Order | Family | Genus | Species |
|-------------|--------|------|--------|-------|-------|--------|-------|---------|
| S1-0-10cm   | 86195  | 718  | 5      | 9     | 22    | 34     | 49    | 90      |
| S2-0-10cm   | 70481  | 758  | 5      | 10    | 22    | 34     | 52    | 94      |
| S3-0-10cm   | 80416  | 772  | 6      | 10    | 22    | 35     | 51    | 94      |
| S4-10-20cm  | 66846  | 820  | 5      | 10    | 24    | 37     | 56    | 101     |
| S5-10-20cm  | 100501 | 789  | 5      | 10    | 23    | 36     | 54    | 96      |
| S6-10-20cm  | 81996  | 736  | 6      | 11    | 23    | 36     | 54    | 98      |
| S7-20-30cm  | 68499  | 779  | 6      | 10    | 21    | 35     | 52    | 97      |
| S8-20-30cm  | 64514  | 787  | 5      | 10    | 22    | 36     | 53    | 97      |
| S9-20-30cm  | 87197  | 776  | 5      | 10    | 23    | 37     | 56    | 98      |
| S10-30-40cm | 83713  | 783  | 5      | 10    | 23    | 37     | 54    | 96      |
| S11-30-40cm | 74631  | 690  | 3      | 8     | 21    | 31     | 46    | 85      |
| S12-30-40cm | 66249  | 805  | 5      | 10    | 24    | 38     | 53    | 94      |
| S13-40-50cm | 67937  | 854  | 6      | 11    | 24    | 37     | 55    | 100     |
| S14-40-50cm | 73389  | 747  | 4      | 8     | 21    | 34     | 52    | 91      |
| S15-40-50cm | 91327  | 843  | 5      | 10    | 23    | 37     | 54    | 97      |
| S16-50-60cm | 73672  | 863  | 6      | 11    | 25    | 39     | 56    | 99      |
| S17-50-60cm | 54512  | 748  | 6      | 11    | 24    | 37     | 52    | 92      |
| S18-50-60cm | 58440  | 816  | 4      | 9     | 23    | 37     | 55    | 96      |
| S19-60-70cm | 89734  | 789  | 6      | 11    | 23    | 37     | 54    | 96      |
| S20-60-70cm | 86355  | 625  | 6      | 11    | 25    | 37     | 53    | 86      |
| S21-60-70cm | 74963  | 664  | 5      | 10    | 23    | 35     | 52    | 89      |
| S22-70-80cm | 74963  | 725  | 6      | 10    | 23    | 35     | 50    | 91      |

---

|              |         |     |   |    |    |    |    |     |
|--------------|---------|-----|---|----|----|----|----|-----|
| S23-70-80cm  | 104660  | 719 | 6 | 11 | 24 | 36 | 51 | 90  |
| S24-70-80cm  | 100077  | 627 | 4 | 8  | 22 | 31 | 46 | 79  |
| S25-80-90cm  | 54074   | 696 | 5 | 10 | 23 | 35 | 53 | 92  |
| S26-80-90cm  | 65338   | 758 | 5 | 10 | 23 | 35 | 50 | 92  |
| S27-80-90cm  | 71914   | 579 | 6 | 11 | 24 | 36 | 48 | 77  |
| S28-90-100cm | 57216   | 777 | 6 | 11 | 25 | 38 | 55 | 96  |
| S29-90-100cm | 60295   | 654 | 5 | 10 | 23 | 36 | 50 | 86  |
| S30-90-100cm | 60282   | 761 | 5 | 11 | 24 | 37 | 55 | 91  |
| Total        | 2253352 | 974 | 6 | 11 | 25 | 39 | 58 | 103 |

---

**Table S2.** Pearson's correlations between the abundance of diazotrophic genera and the nitrogen fixation rate (NFR).

|         |                        |                        |                           |                            |                         |                          |
|---------|------------------------|------------------------|---------------------------|----------------------------|-------------------------|--------------------------|
| Genus   | <i>Bradyrhizobium</i>  | <i>Geobacter</i>       | <i>Azotobacter</i>        | <i>Halorhodospira</i>      | <i>unidentified</i>     | <i>Desulfovibrio</i>     |
| r-value | -0.326                 | -0.277                 | 0.693*                    | -0.507                     | 0.540                   | -0.750*                  |
| p-value | 0.358                  | 0.439                  | 0.026                     | 0.135                      | 0.107                   | 0.012                    |
| Genus   | <i>Dechloromonas</i>   | <i>Agrobacterium</i>   | <i>Anaeromyxobacter</i>   | <i>Marichromatium</i>      | <i>Pelobacter</i>       | <i>Desulfobulbus</i>     |
| r-value | 0.003                  | 0.853**                | -0.726*                   | -0.830**                   | 0.430                   | 0.161                    |
| p-value | 0.993                  | 0.002                  | 0.017                     | 0.003                      | 0.215                   | 0.657                    |
| Genus   | <i>Pseudomonas</i>     | <i>Rubrivivax</i>      | <i>Azohydromonas</i>      | <i>Pseudodesulfovibrio</i> | <i>Methylobacterium</i> | <i>Desulfatibacillum</i> |
| r-value | -0.756*                | -0.711*                | -0.216                    | -0.433                     | -0.677*                 | 0.478                    |
| p-value | 0.010                  | 0.021                  | 0.549                     | 0.211                      | 0.031                   | 0.162                    |
| Genus   | <i>Sinorhizobium</i>   | <i>Azoarcus</i>        | <i>Zoogloea</i>           | <i>Pelomonas</i>           | <i>Ideonella</i>        | <i>Azospirillum</i>      |
| r-value | -0.186                 | -0.464                 | 0.563                     | -0.581                     | 0.444                   | -0.674*                  |
| p-value | 0.607                  | 0.177                  | 0.090                     | 0.078                      | 0.198                   | 0.033                    |
| Genus   | <i>Dehalococcoides</i> | <i>Geoalkalibacter</i> | <i>Ectothiorhodospira</i> | <i>Methylomonas</i>        | <i>Desulfuromonas</i>   | <i>Dickeya</i>           |
| r-value | 0.122                  | -0.426                 | -0.282                    | -0.638*                    | 0.450                   | -0.648*                  |
| p-value | 0.738                  | 0.219                  | 0.431                     | 0.047                      | 0.192                   | 0.043                    |
| Genus   | <i>Sideroxydans</i>    | <i>Thiocapsa</i>       | <i>Desulfarculus</i>      | <i>Sulfuricurvum</i>       | <i>Chlorobaculum</i>    | <i>Azomonas</i>          |
| r-value | -0.533                 | -0.729*                | -0.567                    | 0.163                      | 0.323                   | -0.345                   |
| p-value | 0.112                  | 0.017                  | 0.087                     | 0.652                      | 0.362                   | 0.329                    |
| Genus   | <i>Methylocystis</i>   | <i>Klebsiella</i>      | <i>Methanoregula</i>      | <i>Azorhizobium</i>        | <i>Rhodobacter</i>      | <i>Xanthobacter</i>      |
| r-value | -0.772**               | 0.325                  | 0.246                     | -0.168                     | -0.207                  | -0.484                   |
| p-value | 0.009                  | 0.360                  | 0.493                     | 0.642                      | 0.567                   | 0.156                    |
| Genus   | <i>Pelosinus</i>       | <i>Allochromatium</i>  | <i>Heliobacterium</i>     | <i>Desulfurivibrio</i>     | <i>Methanotherix</i>    | <i>Nitratireductor</i>   |
| r-value | -0.618                 | 0.408                  | -0.289                    | -0.021                     | 0.148                   | -0.116                   |

|                 |                     |                                  |                         |                         |                        |               |
|-----------------|---------------------|----------------------------------|-------------------------|-------------------------|------------------------|---------------|
| <i>p</i> -value | 0.057               | 0.241                            | 0.418                   | 0.953                   | 0.683                  | 0.749         |
| Genus           | <i>Methanocella</i> | <i>Thioalkalispira</i>           | <i>Magnetospirillum</i> | <i>Azospira</i>         | <i>Thiorhodococcus</i> | <i>Vibrio</i> |
| r-value         | -0.186              | -0.373                           | -0.546                  | 0.538                   | -0.213                 | 0.096         |
| <i>p</i> -value | 0.607               | 0.288                            | 0.103                   | 0.108                   | 0.554                  | 0.193         |
| Genus           | <i>Leptothrix</i>   | <i>Candidatus_Accumulibacter</i> | <i>Paraburkholderia</i> | <i>Rhodopseudomonas</i> | <i>Methylococcus</i>   |               |
| r-value         | -0.429              | -0.101                           | -0.383                  | -0.482                  | -0.620                 |               |
| <i>p</i> -value | 0.216               | 0.780                            | 0.274                   | 0.158                   | 0.056                  |               |

Note: \*:  $p < 0.05$  means a significant correlation, \*\*:  $p < 0.01$  is very significant.

**Table S3.** Relative abundances of diazotrophic communities at the genus level.

|                                |                        |                        |                           |                            |                         |                          |
|--------------------------------|------------------------|------------------------|---------------------------|----------------------------|-------------------------|--------------------------|
| Genus                          | <i>Bradyrhizobium</i>  | <i>Geobacter</i>       | <i>Azotobacter</i>        | <i>Halorhodospira</i>      | <i>unidentified</i>     | <i>Desulfovibrio</i>     |
| Average relative abundance (%) | 15.18 ± 5.51           | 14.74 ± 4.87           | 11.92 ± 13.9              | 11.12 ± 4.46               | 8.59 ± 5.20             | 5.19 ± 3.51              |
| Genus                          | <i>Dechloromonas</i>   | <i>Agrobacterium</i>   | <i>Anaeromyxobacter</i>   | <i>Marichromatium</i>      | <i>Pelobacter</i>       | <i>Desulfobulbus</i>     |
| Average relative abundance (%) | 3.51 ± 3.87            | 3.28 ± 5.19            | 2.88 ± 3.12               | 2.81 ± 1.21                | 2.68 ± 1.67             | 2.64 ± 1.69              |
| Genus                          | <i>Pseudomonas</i>     | <i>Rubrivivax</i>      | <i>Azohydromonas</i>      | <i>Pseudodesulfovibrio</i> | <i>Methylobacterium</i> | <i>Desulfatibacillum</i> |
| Average relative abundance (%) | 1.70 ± 1.09            | 1.64 ± 1.39            | 1.38 ± 2.43               | 1.32 ± 0.86                | 1.01 ± 0.81             | 0.91 ± 2.30              |
| Genus                          | <i>Sinorhizobium</i>   | <i>Azoarcus</i>        | <i>Zoogloea</i>           | <i>Pelomonas</i>           | <i>Ideonella</i>        | <i>Azospirillum</i>      |
| Average relative abundance (%) | 0.70 ± 0.91            | 0.58 ± 0.71            | 0.52 ± 0.50               | 0.51 ± 0.94                | 0.48 ± 0.38             | 0.45 ± 0.44              |
| Genus                          | <i>Dehalococcoides</i> | <i>Geoalkalibacter</i> | <i>Ectothiorhodospira</i> | <i>Methylomonas</i>        | <i>Desulfuromonas</i>   | <i>Dickeya</i>           |
| Average relative abundance (%) | 0.45 ± 1.32            | 0.44 ± 0.59            | 0.40 ± 0.33               | 0.33 ± 0.41                | 0.28 ± 0.70             | 0.25 ± 0.22              |
| Genus                          | <i>Sideroxydans</i>    | <i>Thiocapsa</i>       | <i>Desulfarculus</i>      | <i>Sulfuricurvum</i>       | <i>Chlorobaculum</i>    | <i>Azomonas</i>          |
| Average relative abundance (%) | 0.18 ± 0.23            | 0.18 ± 0.12            | 0.14 ± 0.12               | 0.14 ± 0.19                | 0.12 ± 0.39             | 0.12 ± 0.33              |
| Genus                          | <i>Methylocystis</i>   | <i>Klebsiella</i>      | <i>Methanoregula</i>      | <i>Azorhizobium</i>        | <i>Rhodobacter</i>      | <i>Xanthobacter</i>      |

|                                |                     |                                  |                         |                         |                        |                        |
|--------------------------------|---------------------|----------------------------------|-------------------------|-------------------------|------------------------|------------------------|
| Average relative abundance (%) | 0.11 ± 0.11         | 0.09 ± 0.20                      | 0.08 ± 0.27             | 0.08 ± 0.13             | 0.08 ± 0.06            | 0.08 ± 0.06            |
| Genus                          | <i>Pelosinus</i>    | <i>Allochromatium</i>            | <i>Heliobacterium</i>   | <i>Desulfurivibrio</i>  | <i>Methanotherix</i>   | <i>Nitratireductor</i> |
| Average relative abundance (%) | 0.08 ± 0.09         | 0.07 ± 0.08                      | 0.06 ± 0.09             | 0.6 ± 0.08              | 0.05 ± 0.05            | 0.05 ± 0.09            |
| Genus                          | <i>Methanocella</i> | <i>Thioalkalispira</i>           | <i>Magnetospirillum</i> | <i>Azospira</i>         | <i>Thiorhodococcus</i> | <i>Vibrio</i>          |
| Average relative abundance (%) | 0.05 ± 0.06         | 0.05 ± 0.14                      | 0.04 ± 0.05             | 0.03 ± 0.04             | 0.03 ± 0.05            | 0.03 ± 0.04            |
| Genus                          | <i>Leptothrix</i>   | <i>Candidatus_Accumulibacter</i> | <i>Paraburkholderia</i> | <i>Rhodopseudomonas</i> | <i>Methylococcus</i>   |                        |
| Average relative abundance (%) | 0.02 ± 0.04         | 0.02 ± 0.05                      | 0.02 ± 0.14             | 0.02 ± 0.03             | 0.02 ± 0.02            |                        |

Note: Data are shown as means ± SD.

**Table S4.** Mantel test for the correlations between diazotrophic community structure and sediment properties.

| Correlation between diazotrophic community structure and: | Mantel r | <i>p</i>      |
|-----------------------------------------------------------|----------|---------------|
| Salinity                                                  | 0.477**  | < <b>0.01</b> |
| pH                                                        | 0.240**  | < <b>0.01</b> |
| Fe <sup>3+</sup>                                          | 0.237**  | < <b>0.01</b> |
| Water content                                             | 0.209**  | < <b>0.01</b> |
| NH <sub>4</sub> <sup>+</sup>                              | 0.192*   | < <b>0.05</b> |
| NO <sub>3</sub> <sup>-</sup>                              | 0.075    | ≥ 0.05        |
| NO <sub>2</sub> <sup>-</sup>                              | 0.010    | ≥ 0.05        |
| Total Fe                                                  | 0.002    | ≥ 0.05        |
| Available Fe                                              | -0.06    | ≥ 0.05        |

Note: Bold value indicates  $p < 0.05$ . (\*:  $p < 0.05$ ; \*\*:  $p < 0.01$ )



## B. Supplementary figures

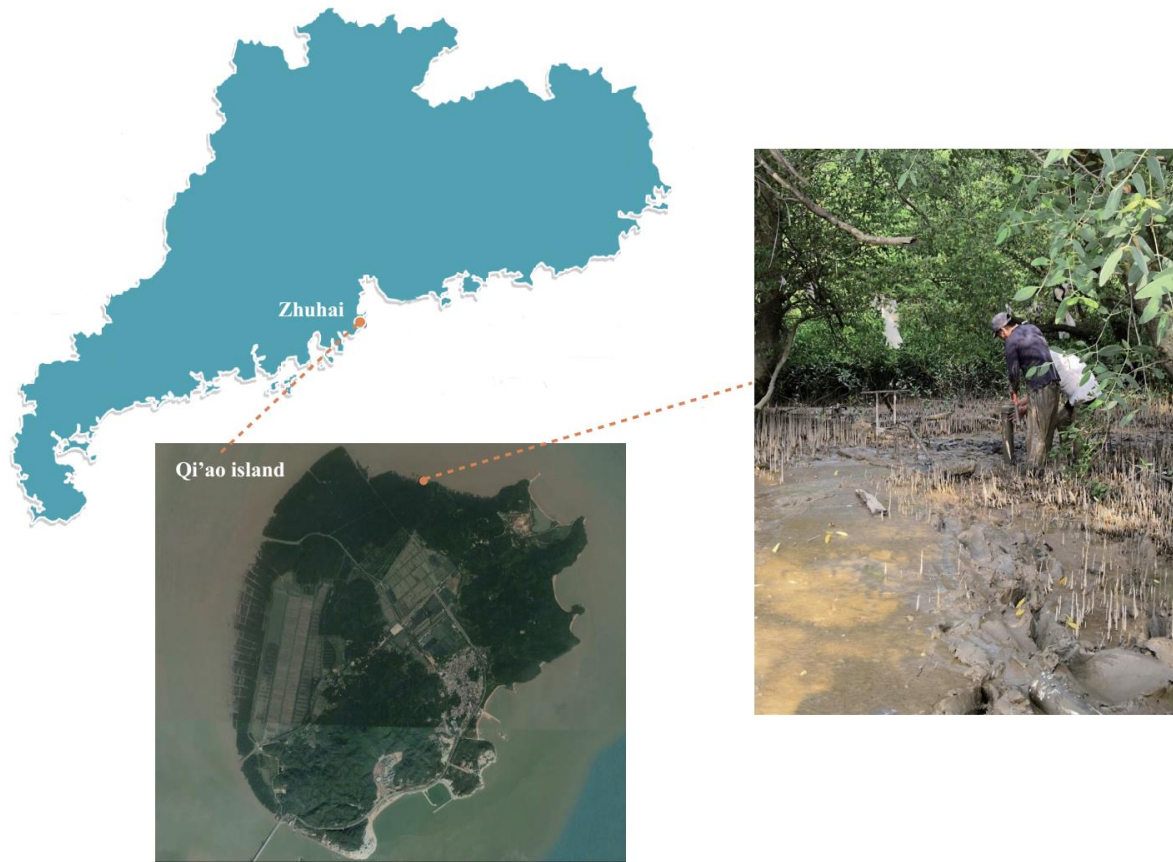

**Fig. S1.** The location of the sampling habitats at the Qi'ao Island, Guangdong Province, China.

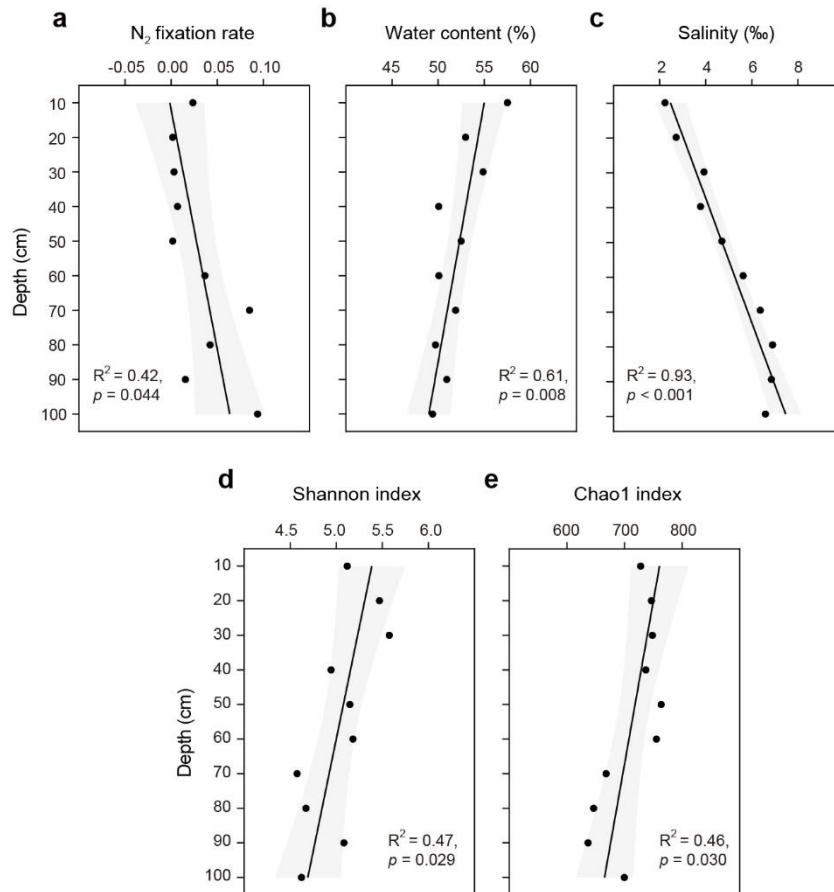

**Fig. S2.** Relationships between the depth of mangrove sediments and the NFR (a), water content (b), salinity (c), Shannon index (d) and Chao1 index (e). NFR was represented as acetylene reduction ( $\text{nmol g}^{-1} \text{h}^{-1}$ ) in this research. Black lines and grey shaded areas represent linear regressions and 95% confidence intervals, respectively.  $R^2$  was obtained by linear regression analysis and  $p$  was obtained by Pearson's correlation analysis.

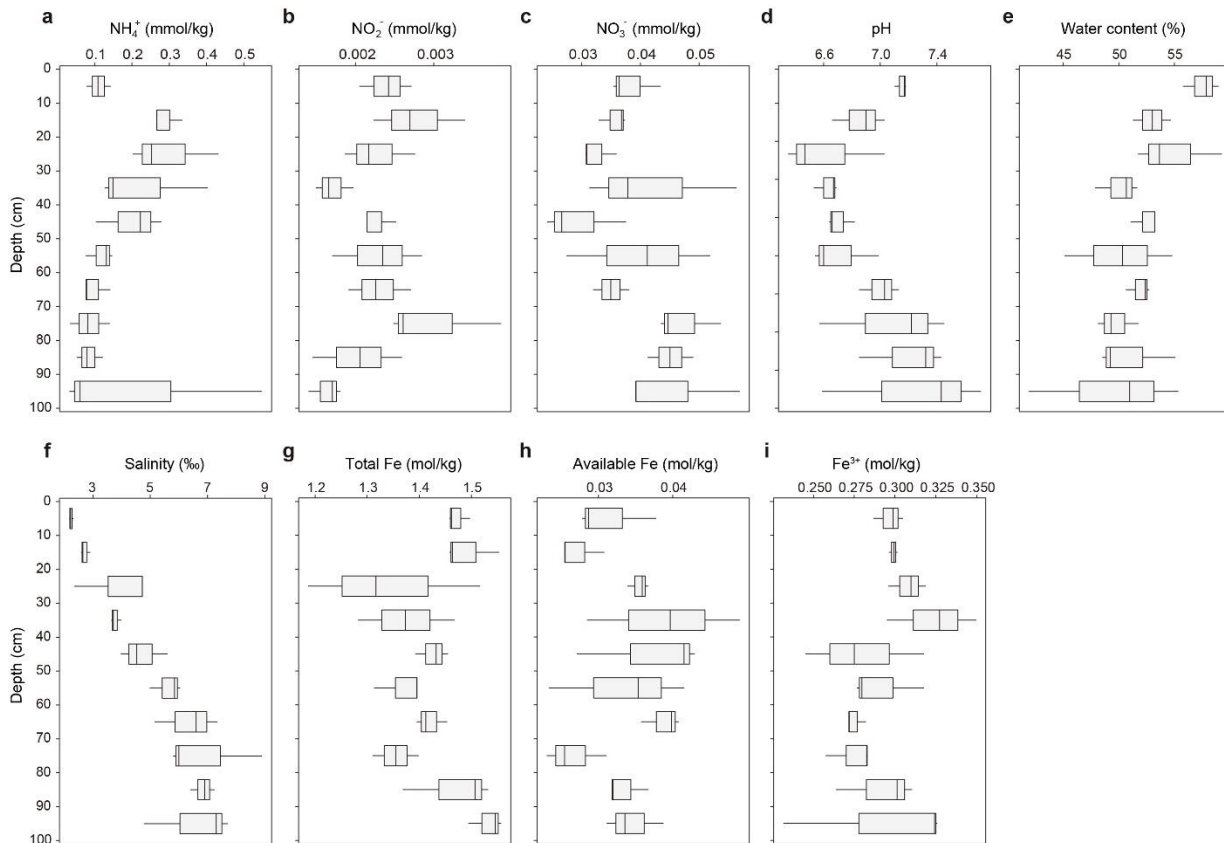

**Fig. S3.** The in-depth profile of physicochemical properties. The concentration of  $\text{NH}_4^+$  (a),  $\text{NO}_2^-$  (b),  $\text{NO}_3^-$  (c), pH (d), water content (e), salinity (f), total Fe (g), available Fe (h) and  $\text{Fe}^{3+}$  (i) across 10 depths of mangrove sediments. Boxplots depict the 25-75% quantile range of the selected measurements, with the centerline depicting the median (50% quantile). Whiskers show the minimum and maximum values.

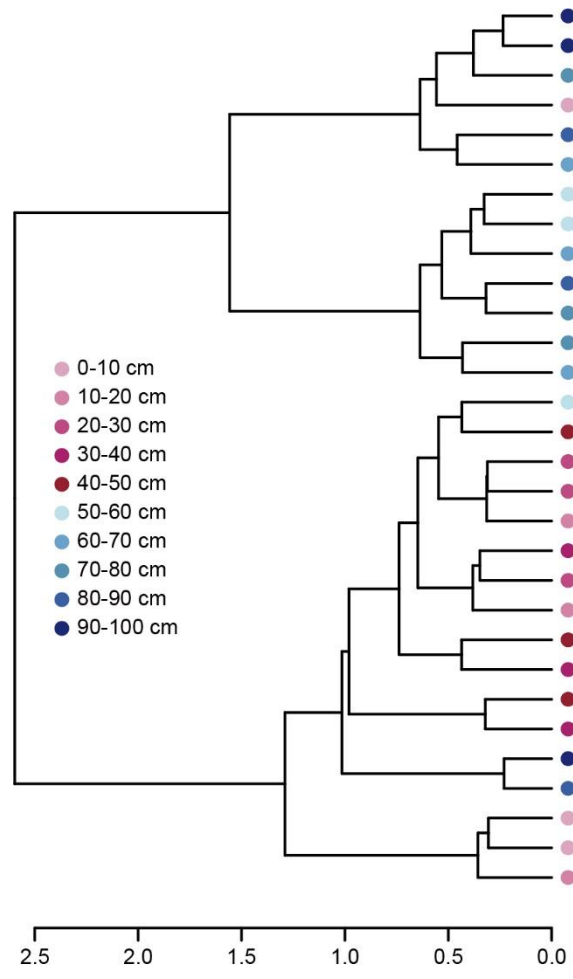

**Fig. S4.** Bray-Curtis distance-based hierarchical clustering of diazotrophic communities across 10 depths of mangrove sediments. The color gradient represents sediment depth.
